# Supplementary material
Source: publisher figshare collection journal article supplement (https://gsapubs.figshare.com/articles/dataset/_/22251082)

Canil, D., and Morris, R.A., 2023, Continentalization of an intraoceanic arc as exemplified by the Jurassic Bonanza arc of Vancouver Island, Canada: GSA Bulletin, <https://doi.org/10.1130/B36716.1>.

## Supplemental Material

**Figure S1.** U-Pb Concordia for Zircons.

**Figure S2.** Whole Rock Sample Locations.

**Figure S3.** Restoration of 25 km Sinistral Offset on San Juan Fault.

**Table S1.** U-Pb Zircon Ages of Samples.

**Table S2.** Major and Trace Element Compositions of Samples and Plutonic Unit Averages.

# Supplemental Material 1 – U-Pb Concordia for Zircons

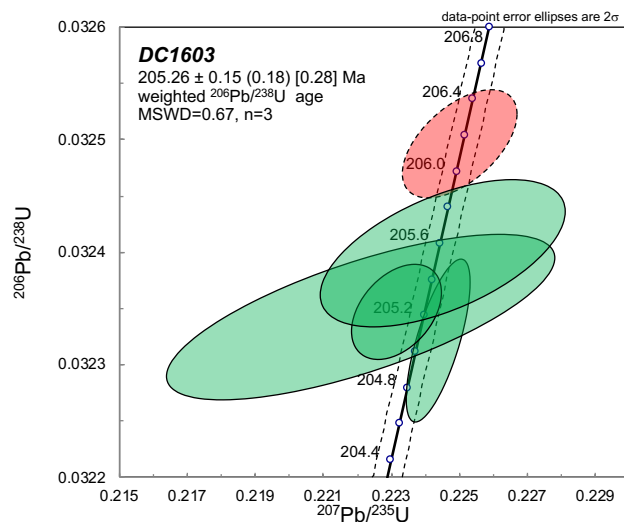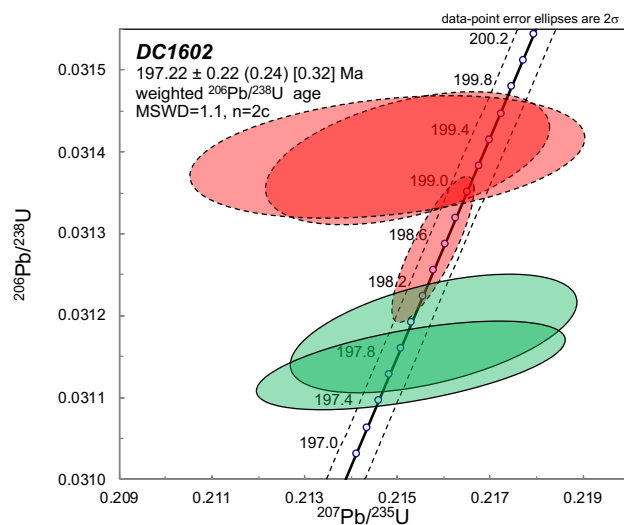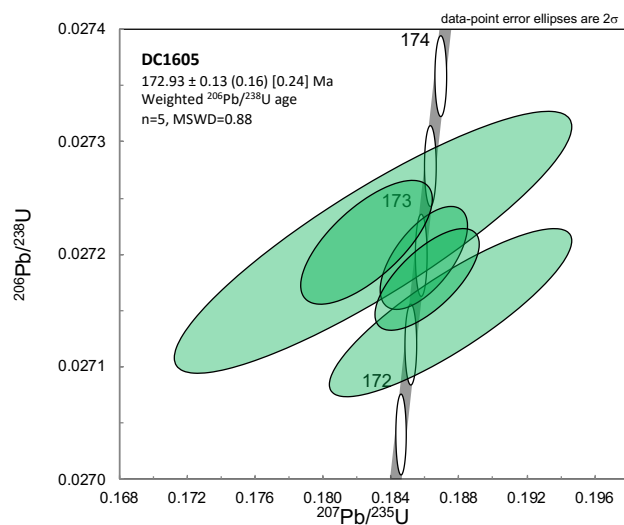

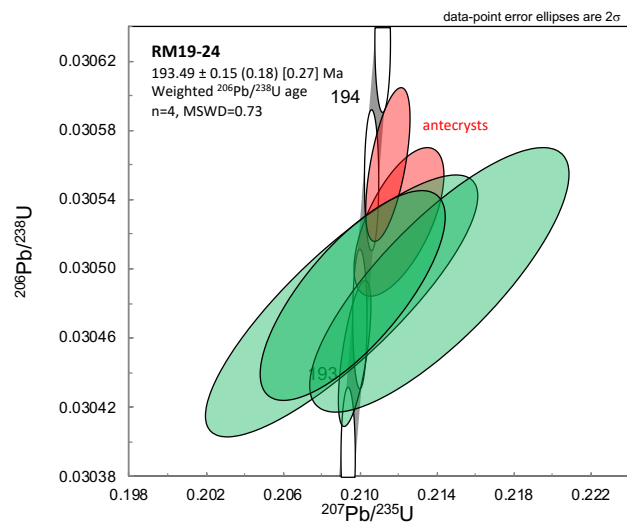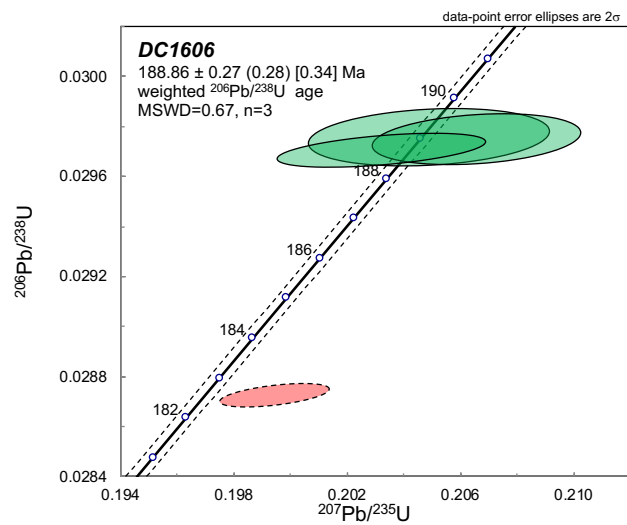

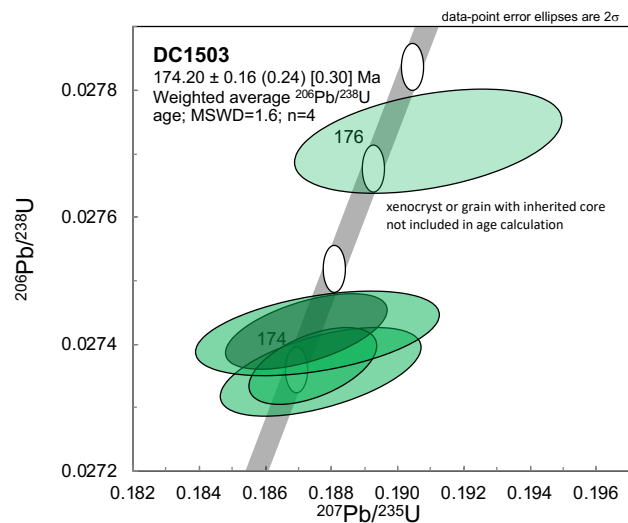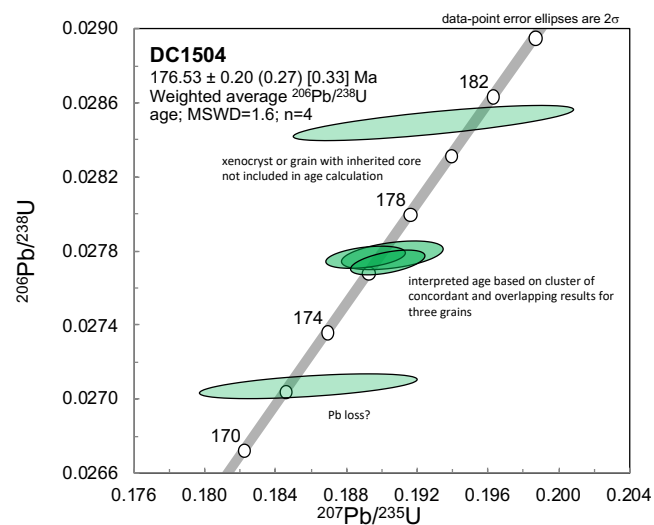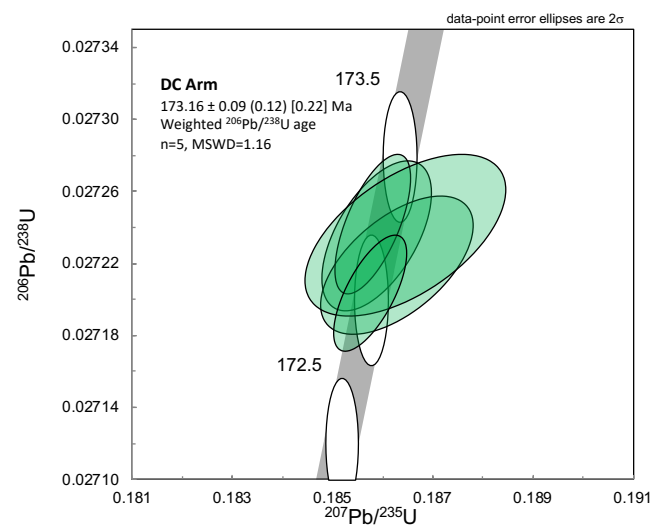

Figure S2 – Whole Rock Sample Locations

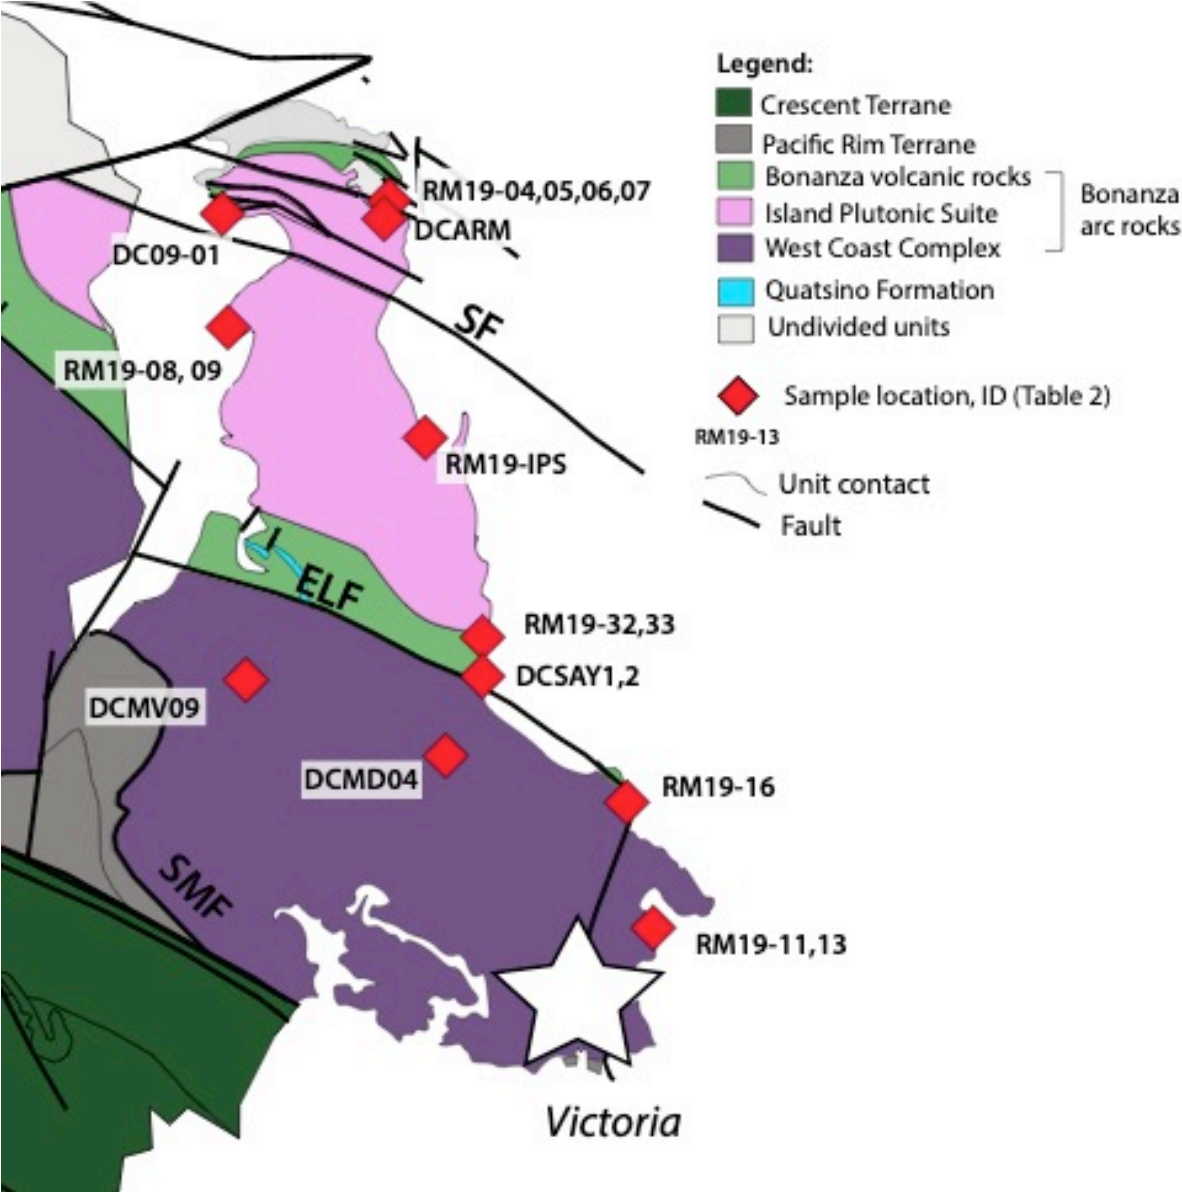

**Figure S3 –  
Restoration of 25 km Sinistral Offset on San Juan Fault**

Timeslice 1: Eocene and older

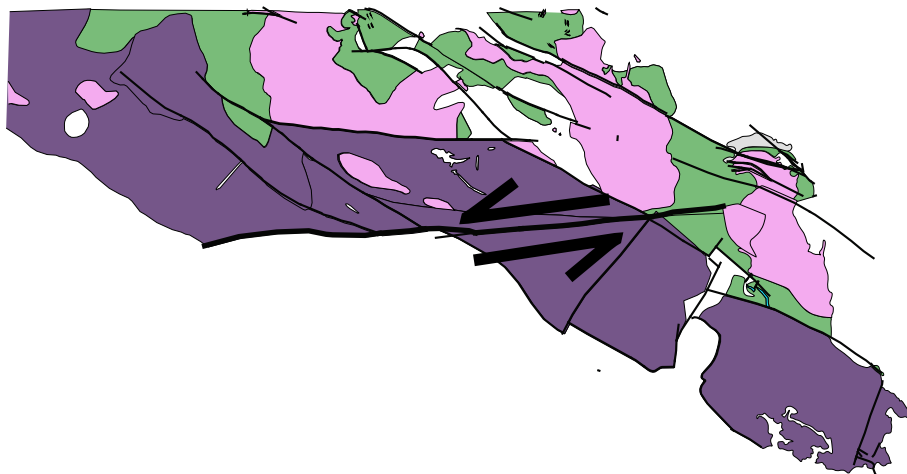

Timeslice 2: modern

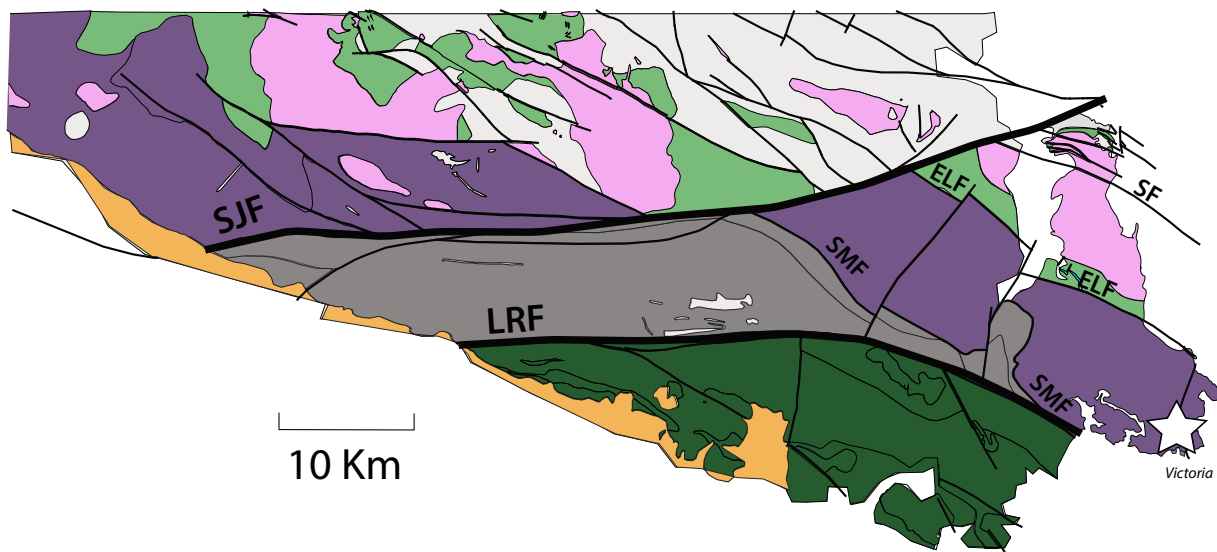

Supplement: Supplementary file 1 [file 1]
