# Supplementary material
Source: publisher figshare collection journal article supplement (https://gsapubs.figshare.com/articles/dataset/_/22251082)
Supplement: Supplementary file 1 [file 1]

## Sheet: UPb zircon ages
TABLE S1. U-PB ZIRCON AGES OF SAMPLES
				Compositional Parameters							Radiogenic Isotope Ratios									Isotopic Ages
	Wt.	U	Pb	Th	206Pb*	mol %	Pb*	Pbc	206Pb		208Pb	207Pb		207Pb		206Pb		corr.		207Pb		207Pb		206Pb
Sample	mg	ppm	ppm	U	x10-13 mol	206Pb*	Pbc	(pg)	204Pb		206Pb	206Pb	% err	235U	% err	238U	% err	coef.		206Pb	±	235U	±	238U	±
(a)	(b)	(c)	ages	(d)	(e)	(e)	(e)	(e)	(f)		(g)	(g)	(h)	(g)	(h)	(g)	(h)			(i)	(h)	(i)	(h)	(i)	(h)
DC1602 (Quinsam NE)
lat:49.8573; long: -125.4937
A	0.00136406	160.714	5.77318	0.292601	0.286929	0.954457	6.06721	1.1143	411.702		0.0930507	0.0497211	1.08405	0.21522	1.16598	0.0313936	0.213382	0.461949		181.976	25.253	197.924	2.09676	199.264	0.418689
B	0.00500156	306.864	9.7169	0.321462	2.00166	0.993649	45.6753	1.04123	2952.42		0.102233	0.050024	0.19509	0.215762	0.335745	0.031282	0.234897	0.823163		196.109	4.53287	198.376	0.605013	198.567	0.459317
C	0.00170508	318.252	13.5337	0.263887	0.705375	0.898032	2.50552	6.58328	181.438		0.0839255	0.0501916	1.08615	0.215771	1.17449	0.0311789	0.190195	0.527962		203.877	25.2007	198.384	2.11651	197.922	0.370719
D	0.00341016	95.0009	3.18216	0.20649	0.424041	0.968832	8.84067	1.10274	601.587		0.0656664	0.0496175	1.5699	0.214782	1.61912	0.031395	0.193473	0.31031		177.116	36.6033	197.557	2.90676	199.273	0.379642
E	0.00189453	148.967	5.27033	0.230104	0.366401	0.952114	5.65735	1.49982	391.557		0.0731824	0.0501394	1.19257	0.215279	1.26885	0.0311402	0.142423	0.575738		201.463	27.682	197.973	2.28226	197.681	0.277269
DC1603 (Quinsam Quarry)
lat:49.8537; long: -125.4949
A	0.00312598	185.326	6.56639	0.37459	0.784912	0.97558	11.8362	1.5991	767.803		0.119079	0.0502214	0.556661	0.225028	0.613513	0.0324973	0.119549	0.551153		205.254	12.9124	206.086	1.14431	206.159	0.242562
B	0.0181875	103.306	3.39206	0.325665	2.53191	0.993009	41.5268	1.45068	2682.18		0.103532	0.0503497	0.245448	0.224387	0.340071	0.0323221	0.182919	0.714269		211.169	5.68732	205.554	0.632816	205.065	0.369199
C	0.00189453	133.145	4.85825	0.377216	0.340144	0.965173	8.21398	0.998929	538.38		0.11992	0.0498007	1.97592	0.222086	2.10515	0.0323434	0.18655	0.715737		185.699	45.998	203.645	3.88447	205.198	0.376767
D	0.00397852	268.556	9.07374	0.4161	1.44096	0.991779	36.4892	0.962943	2280.66		0.132281	0.0500292	0.454277	0.223137	0.487209	0.0323479	0.10703	0.407285		196.353	10.5546	204.517	0.902487	205.226	0.216194
E	0.00102305	225.216	8.31966	0.380284	0.311238	0.962232	7.56045	0.994271	496.45		0.120893	0.0502558	1.2257	0.22451	1.31182	0.0324002	0.165176	0.567277		206.842	28.4233	205.656	2.44218	205.553	0.334168
DC1605 (Quinsam Rd)
lat: 49.85777; long: -125.51614
T-1	0.00344	33.5346	1.02514	0.418144	0.130562	0.969281	9.3666	0.340176	602.232		0.133172	0.0500902	2.92089	0.187501	3.11026	0.0271488	0.224052	0.855414		199.181	67.8262	174.495	4.98651	172.679	0.381754
T-4	0.00826	10.0822	0.306422	0.291363	0.0944726	0.961921	7.23237	0.307451	485.836		0.0927923	0.0487566	4.91983	0.182931	5.22471	0.0272116	0.348629	0.882076		136.142	115.575	170.58	8.2039	173.073	0.595355
2-1	0.00578	40.9173	1.15234	0.267133	0.26815	0.982722	16.1851	0.387578	1070.75		0.0850761	0.0495771	1.04946	0.185913	1.13008	0.0271974	0.138383	0.623279		175.217	24.4769	173.136	1.79886	172.984	0.236197
2-2	0.00496	28.3646	0.880721	0.470016	0.159598	0.968741	9.31789	0.423379	591.821		0.149689	0.0486611	1.63071	0.182573	1.74076	0.0272115	0.163907	0.697407		131.536	38.3409	170.272	2.72884	173.073	0.279903
2-5	0.00358	50.5502	1.48363	0.394776	0.205042	0.980171	14.5755	0.34101	932.982		0.125728	0.0496644	1.26271	0.18611	1.35343	0.0271783	0.136879	0.691435		179.315	29.4284	173.304	2.1563	172.864	0.23347
RM19-24 (Holland Pt.)
lat:48.4094; long: -123.3766
T-3	0.0079	274.492	8.90853	0.573107	2.75299	0.99829	180.541	0.387666	10819		0.182315	0.0499331	0.262337	0.209652	0.321182	0.0304516	0.113418	0.648109		191.879	6.10003	193.261	0.565224	193.374	0.216063
2-1	0.004	123.272	3.93631	0.437959	0.627563	0.993331	44.4585	0.346365	2774.13		0.139318	0.050354	0.838947	0.211947	0.906275	0.0305276	0.11437	0.630312		211.366	19.4385	195.185	1.60929	193.849	0.218405
4-5	0.0013	126.391	4.28556	0.423932	0.208787	0.97334	10.85	0.470147	693.913		0.134858	0.0497307	2.60163	0.208992	2.77007	0.0304792	0.203382	0.83971		182.427	60.5995	192.707	4.86215	193.547	0.387788
6-6	0.0018	57.4981	1.96167	0.352911	0.131577	0.9665	8.41765	0.374935	552.233		0.112265	0.0509076	2.40891	0.214042	2.56999	0.0304941	0.205489	0.799232		236.65	55.5588	196.939	4.60073	193.64	0.391991
4-2	0.0044	106.676	3.30637	0.302122	0.598028	0.991658	34.1744	0.413597	2217.59		0.0961062	0.0501679	0.384747	0.211393	0.443652	0.0305607	0.118234	0.598617		202.779	8.92858	194.721	0.786101	194.057	0.226022
4-6 rubble	0.0006	205.001	6.90602	0.389995	0.156328	0.97283	10.5444	0.35893	680.907		0.124062	0.0498542	1.74818	0.209551	1.86691	0.0304851	0.163173	0.748311		188.199	40.6772	193.176	3.28413	193.584	0.31118
DC1606 (Arbutus)
lat:48.4839; long: -123.3008
A	0.00390137	119.8	3.7992	0.463496	0.579921	0.989541	28.7115	0.498866	1792.74		0.147481	0.0499281	1.65923	0.204884	1.69632	0.0297619	0.317309	0.209146		191.65	38.5829	189.25	2.92887	189.058	0.591186
B	0.00190938	150.928	4.579	0.395188	0.345164	0.986976	22.5848	0.370705	1439.65		0.125791	0.0503415	0.725317	0.199418	0.787614	0.02873	0.136418	0.52538		210.79	16.8072	184.633	1.32965	182.595	0.245597
C	0.00440625	166.583	5.22765	0.45915	0.910459	0.992426	39.7322	0.565507	2475.66		0.146098	0.0503524	1.41814	0.20656	1.46382	0.0297526	0.283035	0.255547		211.294	32.8586	190.662	2.54457	189	0.52717
D	0.00358008	99.6029	3.17185	0.406546	0.44165	0.983132	17.4124	0.616728	1111.58		0.129362	0.0496039	1.39459	0.203187	1.47972	0.0297084	0.188272	0.502785		176.476	32.5194	187.82	2.53731	188.723	0.350161
DC1503 (Kwatsech)
lat:48.4875; long: -123.3007
A	0.00146875	85.1631	2.60364	0.379953	0.142646	0.96872	9.09893	0.378664	591.435		0.121455	0.0497503	1.22218	0.187655	1.32532	0.0273567	0.208565	0.55394		183.346	28.4622	174.627	2.12628	173.983	0.357829
B	0.00190938	131.076	3.87379	0.443951	0.285513	0.984153	18.4375	0.380529	1167.4		0.141705	0.049674	0.764697	0.18743	0.845177	0.0273658	0.18345	0.52634		179.766	17.8201	174.434	1.35459	174.041	0.314846
C	0.00183594	96.8054	2.95473	0.451059	0.203155	0.975164	11.7531	0.425362	744.886		0.143549	0.0495234	0.974167	0.187231	1.06433	0.0274199	0.179081	0.56627		172.685	22.731	174.264	1.70431	174.38	0.307939
D	0.00143203	99.2623	3.09774	0.405665	0.164268	0.968345	9.11741	0.438459	584.424		0.130016	0.0499494	1.64705	0.190917	1.7303	0.0277213	0.241301	0.40644		192.637	38.2917	177.411	2.81653	176.271	0.419365
E	0.00132187	103.947	3.19278	0.428576	0.157047	0.971362	10.1637	0.378053	645.998		0.13663	0.0496156	1.53156	0.187562	1.60872	0.0274173	0.199253	0.439875		177.026	35.7085	174.547	2.57987	174.364	0.342593
DC1504 (McKenzie Bight)
lat:48.5558; long: -123.5051
A	0.00330469	74.9815	2.28242	0.451605	0.286942	0.980429	14.8456	0.476011	945.284		0.144224	0.0497655	1.15016	0.190604	1.23001	0.0277781	0.224302	0.435638		184.054	26.7817	177.144	1.99942	176.627	0.390604
B	0.000826172	159.89	5.25333	0.516492	0.149066	0.953552	6.19235	0.60344	398.292		0.165355	0.0497908	2.59456	0.185836	2.70283	0.0270694	0.208178	0.548161		185.238	60.4019	173.07	4.30084	172.181	0.35352
C	0.00330469	93.787	3.59561	0.472942	0.368151	0.915735	3.26652	2.78503	219.546		0.14889	0.049105	3.14822	0.192915	3.35125	0.028493	0.271477	0.765731		152.847	73.7292	179.113	5.50292	181.11	0.484593
D	0.00275391	118.779	3.5861	0.485731	0.378671	0.984795	19.7437	0.476087	1216.67		0.154006	0.049376	0.91154	0.189052	0.967522	0.0277692	0.18156	0.393243		165.725	21.297	175.82	1.56196	176.571	0.316075
E	0.00330469	88.0628	2.71496	0.531444	0.33656	0.982068	16.7584	0.50523	1031.65		0.169699	0.0497534	0.814815	0.190305	0.904269	0.0277412	0.201807	0.532923		183.489	18.9753	176.889	1.46797	176.396	0.350982
DC ARM (Armstrong Pt)
lat:48.6653; long: -123.4010
T-4	0.0184	40.5512	1.14726	0.419421	0.847198	0.993754	47.2247	0.437735	2962.05		0.133574	0.0494922	0.424468	0.185859	0.483013	0.0272362	0.124929	0.569793		171.215	9.90724	173.09	0.768671	173.227	0.21353
2-2	0.0126	45.3587	1.28603	0.411204	0.648532	0.992314	38.2394	0.41295	2407.04		0.130958	0.0496302	0.60505	0.186265	0.663985	0.0272198	0.11548	0.575063		177.713	14.1052	173.438	1.05862	173.124	0.197263
2-4	0.0118	59.8512	1.65937	0.360778	0.802075	0.995145	59.8674	0.321691	3810.55		0.114898	0.0494592	0.268386	0.185777	0.33017	0.0272423	0.115997	0.658768		169.659	6.26602	173.02	0.525239	173.266	0.198307
3-2	0.0118	56.8196	1.63218	0.490585	0.761279	0.994866	58.6296	0.322989	3603.21		0.156238	0.0496459	0.81086	0.186437	0.878687	0.0272362	0.134327	0.562133		178.45	18.9006	173.584	1.40201	173.227	0.229592
4-5	0.0174	41.6078	1.1713	0.420279	0.821056	0.994968	58.6983	0.341393	3676.28		0.133849	0.049517	0.2653	0.185733	0.32197	0.027204	0.0969076	0.684439		172.381	6.19087	172.981	0.512091	173.025	0.165444
(a) A, B, C...T-3, 2-1, etc. are labels for fractions composed of single zircon grains or fragments; all grains annealed and chemically abraded after Mattinson (2005); IDs keyed to mosaic of CL images.
(b) Nominal fraction weights estimated from photomicrographic grain dimensions, adjusted for partial dissolution during chemical abrasion.
(c) Nominal U and total Pb concentrations subject to uncertainty in photomicrographic estimation of weight and partial dissolution during chemical abrasion.
(d) Model Th/U ratio calculated from radiogenic 208Pb/206Pb ratio and 207Pb/235U age.
(e) Pb* and Pbc represent radiogenic and common Pb, respectively; mol % 206Pb* with respect to radiogenic, blank and initial common Pb.
(f) Measured ratio corrected for spike and fractionation only. Mass discrimination of 0.25 ± 0.04%/amu based on analysis of NBS-982; all Daly analyses.
(g) Corrected for fractionation, spike, and common Pb; All common Pb was assumed to be procedural blank: 206Pb/204Pb = 18.50±1.0%; 207Pb/204Pb = 15.50±1.0%; 208Pb/204Pb = 38.40±1.0% ( 1s errors).
(h) Errors are 2-sigma, propagated using the algorithms of Schmitz and Schoene (2007) and Crowley et al. (2007).
(i) Calculations are based on the decay constants of Jaffey et al. (1971). 206Pb/238U and 207Pb/206Pb ages corrected for initial disequilibrium in 230Th/238U using Th/U [magma] = 3.

## Sheet: WholeRock Analyses and Averages
TABLE 2. MAJOR AND TRACE ELEMENT COMPOSITIONS OF SAMPLES AND PLUTONIC UNIT AVERAGES																				TABLE S2. MAJOR AND TRACE ELEMENT COMPOSITIONS OF SAMPLES AND PLUTONIC UNIT AVERAGES
Sample #	DCMD04	DCMV09	RM19- 11	RM19- 13	RM19- 16	DC09-01	RM19-IPS	RM19- 09	RM19- 08	DC- ARM	RM19- 05	RM19- 04	RM19- 06	RM19- 07	RM19- 32	RM19- 33	DCSAY1	DCSAY2			**WCC AVG	N	WCC SE	**IPS AVG	N	IPS SE
Location	Mt Doug	Mt Work	Cattle Pt	Cattle Pt	Arbutus	Madrona	Saanichton	Coles Bay	Coles Bay	Armstrong Pt	Armstrong Pt	Armstrong Pt	Armstrong Pt	Armstrong Pt	Sayward	Sayward	Sayward	Sayward			mezza'			dopo'
Unit/Group	WCC	WCC	WCC	WCC	WCC	IPS	IPS	IPS	IPS	IPS	BONV	BONV	BONV	BONV	BONV	BONV	BONV	BONV			WCC			IPS
Latitude	48.4916	48.5306	48.4384	48.4386	48.4836	48.6755	48.5947	48.6335	48.6335	48.6653	48.6671	48.6657	48.6671	48.6662	48.5311	48.5311	48.529	48.529
Longitude	-123.356	-123.48	-123.292	-123.292	-123.302	-123.484	-123.391	-123.478	-123.478	-123.401	-123.397	-123.399	-123.397	-123.398	-123.366	-123.366	-123.365	-123.365
rock type	dior	gab	gab melanosome	gra leucosome	gra leucosome	gd	gd	gd	gd	gd	dac	bas	bas	bas and	bas and	bas and	and	bas
SiO2	54.6898	50.6327	52.2255	75.6723	74.5648	67.7449	71.3738	70.2364	66.5414	65.4259	67.0117	57.182	49.62	55.1703	55.255	54.5192	63.846	56.5043		SiO2	56.0601	83	0.868735	63.5413	118	0.668091
TiO2	0.808494	1.15187	1.37973	0.41185	0.268	0.461053	0.320632	0.339789	0.473101	0.514251	0.403884	0.913601	1.86358	0.617212	0.899598	0.913287	1.04136	0.860416		TiO2	0.999872	83	0.0679086	0.60892	118	0.032254
Al2O3	18.3542	19.49	15.3815	11.2545	14.0574	15.3375	14.8305	15.3359	15.7803	16.4437	16.1244	14.9126	14.4201	16.0393	18.7807	18.64	15.7975	18.0361		Al2O3	17.0995	83	0.256672	16.5272	118	0.147757
FeO*	7.88029	9.72427	11.1053	1.86146	0.946071	4.68685	3.04889	3.03826	4.51346	5.25353	4.30021	11.6726	12.2013	10.3026	8.36993	8.88838	7.1021	8.24475		FeO*	7.95331	83	0.370205	5.7027	118	0.245573
MnO	0.171844	0.202118	0.244264	0.0550492	0.0202264	0.0938609	0.0844841	0.0796537	0.106499	0.12728	0.105092	0.201771	0.218517	0.172983	0.15242	0.174316	0.0708127	0.180796		MnO	0.166945	83	0.00668149	0.122229	118	0.00485724
MgO	4.39962	4.70234	6.48986	0.764573	0.465208	2.21759	1.09931	1.1696	2.07878	2.41216	2.10184	4.07638	6.88536	5.15879	5.10554	5.25087	1.99942	5.1625		MgO	4.7781	83	0.317134	2.64307	118	0.181613
CaO	7.13256	10.0647	9.34131	8.08408	1.49676	4.62084	2.79917	4.07343	4.05515	2.79194	2.86428	8.64438	11.3485	8.6901	6.74699	7.82818	3.61353	6.38233		CaO	8.03547	83	0.314122	5.43612	118	0.247005
Na2O	4.27539	3.3102	2.75947	1.76361	4.01495	3.66161	3.78652	3.58946	3.91179	4.60876	4.63642	1.19833	2.90669	3.14236	3.5387	2.81258	6.01908	3.55058		Na2O	3.3773	83	0.109276	3.58356	118	0.0678987
K2O	2.12217	0.453735	0.838061	0.0305829	4.09585	1.05207	2.56506	2.03671	2.39623	2.27872	2.31821	1.09591	0.36076	0.634613	0.905994	0.75929	0.145791	0.893091		K2O	1.2552	83	0.0873777	2.11609	118	0.0945902
P2O5	0.165633	0.268116	0.235066	0.101943	0.0707925	0.123773	0.0916093	0.100827	0.143364	0.143703	0.133941	0.102422	0.175226	0.0716498	0.245151	0.213885	0.364477	0.185153		P2O5	0.274202	83	0.0376865	0.163886	118	0.00845017
LOI	2.39	2.31	1.72	2.03	1.06	1.92	1.35	1.1	1.87	2.2	3.05	1.57	2.38	1.82	6.02	6.24	1.99	6.49		LOI
Mg#	0.498783	0.462923	0.510199	0.42267	0.467085	0.457514	0.391237	0.406937	0.450834	0.450068	0.465588	0.383656	0.501458	0.471601	0.520903	0.512904	0.334132	0.527429		Mg#	0.517102			0.45239
Ni	22	32	40			14						20	90	30		20	20	30		Ni	34.0587	71	8.48997	18.8394	62	2.02673
Cr	201	301	120			115							130		20	20				Cr	68.84	5	34.8078	12.25	4	4.64354
V			335	44	12		54	62	117	133	98	439	380	335	232	239	59	207		V	201.711	69	12.4864	121.542	55	11.8191
Sc			43	16	2		7	8	14	15	11	37	42	41	28	29				Sc	23.8709	33	2.49285	15.5278	9	3.61223
Co			35	3	2		5	6	10	12	9	27	46	34	25	25				Co	25.6427	33	3.02399	9.33556	9	3.44575
Cu			30						20	30	30	220	170	380	60	50				Cu	40.3781	37	6.57428	21.5542	12	5.52415
Ga	17	19	16	12	12	14	14	14	14	14	14	15	18	14	16	16				Ga	14.9548	31	0.496305	14.8773	22	0.318202
Pb							6													Pb	2.51875	16	0.556868	3.85545	11	0.768743
Rb	66	4	13		50	22	50	46	49	32	45	20	8	12	16	15				Rb	32.1922	73	2.6276	42.4773	67	3.06685
Ba	744	315	208	21	1191	788	1088	842	941	753	902	457	118	333	240	229				Ba	362.2	48	38.0896	797.138	59	41.3813
Th	2.5	0.3	0.8	0.3	1	3.7	4.2	3.6	3.4	2.8	3	0.7	0.6	0.4	0.6	0.7	2.59	0.93		Th	2.28098	51	0.364772	4.25727	33	0.394071
U	1.2	0.1	0.3	0.2	0.6	1.2	1	1	1.3	1	1.1	0.2	0.2	0.2	0.3	0.3	1.05	0.42		U	0.749167	36	0.0965141	1.72273	33	0.181189
Ta	0.1	0.1	0.4		0.2	0.2	0.4	0.4	0.3	0.3	0.3		0.5		0.1	0.2				Ta	0.347059	34	0.0618052	0.456364	33	0.0350401
Nb	3	3	5		3	4	5	4	4	5	5	1	9		3	3	5.4	2.6		Nb	4.55293	58	0.327145	6.68735	68	0.35278
La	11.2	7.8	8.5	2.7	15.9	14.2	14.6	14.1	13.4	13	14.4	4.3	7.5	2.7	7.2	7.3	18	7.7		La	13.8616	58	2.17679	16.8744	52	0.805092
Ce	22.9	17.8	19.4	6.6	26.2	27.6	26.3	24.6	25	24.8	26.3	10.1	18.6	6.6	16.8	17	40.8	18.1		Ce	27.7088	49	3.56783	31.3483	52	1.6131
Pr	2.92	2.56	2.49	1.05	2.77	2.99	2.86	2.63	2.74	2.79	2.88	1.42	2.71	0.95	2.33	2.33	5.41	2.48		Pr	3.60059	34	0.453897	4.05357	28	0.331562
Sr	615	615	340	193	238	419	332	286	323	289	334	285	244	300	398	350	303	325		Sr	426.057	73	15.9951	338.834	68	13.7988
Nd	11.5	11.3	10.8	5.5	9.7	10.2	10.2	9.3	10.4	10.6	11.3	6.7	13	4.6	10.4	11.1	24.6	11.6		Nd	14.5806	48	1.06026	14.1392	51	0.900498
Zr	47	24	60	50	202	96	100	91	98	85	89	40	101	28	62	58	134	66		Zr	91.8393	61	8.62669	114.337	62	5.76523
Hf	1.5	0.8	1.4	1.6	4.5	2.3	2.5	2	2.3	2.2	2.5	1.1	2.4	0.8	1.5	1.6	3.4	1.9		Hf	2.36939	49	0.23166	3.65303	33	0.320931
Sm	2.8	3.1	2.7	1.9	1.7	2.3	2	1.7	2.3	2.3	2.3	2.2	3.8	1.3	2.8	3	6.46	3.03		Sm	3.51918	49	0.2142	3.32673	52	0.219326
Eu	1.19	1.28	1.21	0.67	0.75	0.66	0.63	0.67	0.68	0.72	0.79	0.88	1.37	0.62	0.95	0.98	1.8	0.927		Eu	1.12837	49	0.0499782	0.995577	52	0.0539492
Gd	2.8	3.5	3	2.6	1.4	2.3	2	1.8	2.1	2.2	2.1	2.7	4.3	1.9	3	3.1				Gd	3.38	39	0.28364	3.61679	28	0.397865
Tb	0.5	0.6	0.5	0.5	0.2	0.4	0.3	0.3	0.3	0.4	0.3	0.5	0.7	0.3	0.5	0.5	1.07	0.52		Tb	0.619773	44	0.0457986	0.599808	52	0.0468676
Dy	2.8	3.7	3	3.3	1.1	2.3	2.1	1.8	2.2	2.3	2.1	3.4	4.5	2.2	3.3	3.3				Dy	3.86706	34	0.31281	3.49574	47	0.293614
Y	14	17	14	19	7	14	13	13	11	13	12	17	21	11	17	16	41.3	20.9		Y	22.4403	62	1.45054	20.0817	60	1.23876
Ho	0.5	0.7	0.6	0.7	0.2	0.5	0.4	0.4	0.4	0.5	0.4	0.7	0.9	0.5	0.7	0.7				Ho	0.795882	34	0.0653581	0.804286	28	0.0914629
Er	1.6	2.1	1.9	2.2	0.6	1.4	1.4	1.2	1.4	1.5	1.3	2.1	2.5	1.4	2	2	4.06	2.09		Er	2.32471	34	0.191103	2.41214	28	0.27021
Tm	0.24	0.31	0.26	0.33	0.1	0.22	0.22	0.18	0.23	0.22	0.21	0.33	0.37	0.21	0.3	0.3				Yb	2.21918	49	0.138564	2.21692	52	0.169621
Yb	1.7	2	1.7	2.2	0.7	1.6	1.5	1.3	1.7	1.5	1.6	2.2	2.3	1.5	2	2	3.89	2.07		Lu	0.339796	49	0.0213699	0.3976	50	0.0253443
Lu	0.28	0.31	0.26	0.36	0.11	0.31	0.25	0.22	0.28	0.23	0.26	0.36	0.35	0.25	0.34	0.33	0.606	0.337
